# Supplementary material for: Nanovesicles as Vanillin Carriers for Antimicrobial Applications
Source: MDPI journal article supplement (doi:10.3390/membranes13010095), 2023-01-11
Supplement: s1 [file s1]

## Nanovesicles as vanillin carriers for antimicrobial applications

*Verdiana Marchianò<sup>1,2</sup>, Maria Matos<sup>1,3</sup>, Miriam López<sup>1</sup>, Shihan Weng<sup>1</sup>, Esther Serrano-Pertierra<sup>2,3</sup>, Susana Luque<sup>1</sup>, M. Carmen Blanco-López<sup>2,3</sup>, Gemma Gutiérrez<sup>1,3\*</sup>*

<sup>1</sup>Department of Chemical and Environmental Engineering, University of Oviedo, Julián Clavería 8, 33006 Oviedo, Spain

<sup>2</sup>Department of Physical and Analytical Chemistry, University of Oviedo, Julián Clavería 8, 33006 Oviedo, Spain

<sup>3</sup> Instituto Universitario de Biotecnología de Asturias, University of Oviedo, 33006, Spain

\*Correspondence: gutierrezgemma@uniovi.es; Tel.: +34 985103510; Fax: +34 985103434

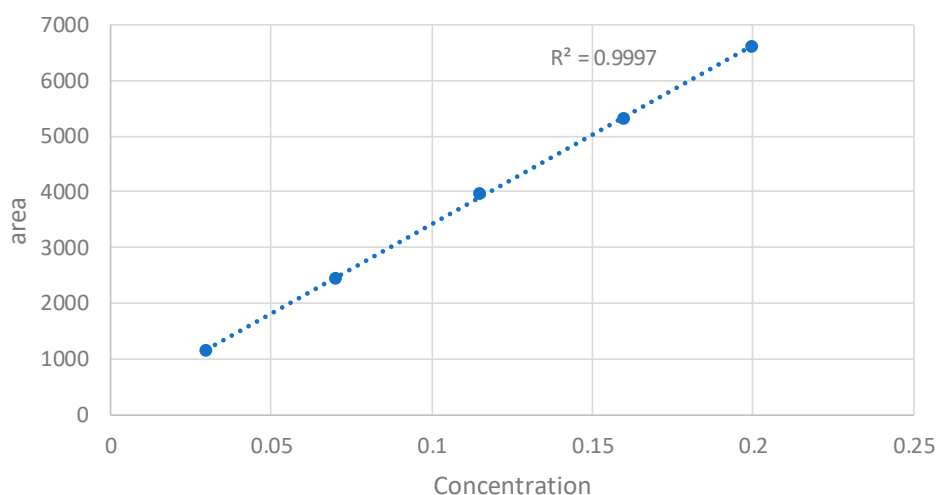

Figure S1. Calibration curve of vanillin determination. Measured at  $\lambda=280\text{nm}$ .

Table S1- Colour of the films with loaded and non-loaded vesicles with vanilla

|                     | Films with:   | L*                        | a*                        | b*                         | C*                         |
|---------------------|---------------|---------------------------|---------------------------|----------------------------|----------------------------|
| Solubility (%)      | Niosomes      | 81.100±4.618 <sup>a</sup> | 2.967±0.153 <sup>c</sup>  | 5.000±2.685 <sup>a</sup>   | 5.967±2.223 <sup>a</sup>   |
| Non-loaded vesicles | Niosomes+CTAB | 82.967±4.086 <sup>a</sup> | 2.667±0.116 <sup>bc</sup> | 3.967±2.376 <sup>a</sup>   | 4.867±2.113 <sup>a</sup>   |
|                     | Niosomes+SDS  | 80.900±0.361 <sup>a</sup> | 3.000±0.000 <sup>c</sup>  | 8.700±0.503 <sup>ab</sup>  | 9.200±0.794 <sup>ab</sup>  |
| Loaded vesicles     | Niosomes      | 81.000±2.152 <sup>a</sup> | -0.433±0.306 <sup>a</sup> | 21.133±1.250 <sup>cd</sup> | 21.167±1.193 <sup>cd</sup> |
|                     | Niosomes+CTAB | 78.167±8.985 <sup>a</sup> | 0.300±1.559 <sup>ab</sup> | 23.600±3.175 <sup>d</sup>  | 23.633±3.232 <sup>d</sup>  |
|                     | Niosomes+SDS  | 83.167±0.643 <sup>a</sup> | 0.367±0.945 <sup>ab</sup> | 15.200±1.540 <sup>bc</sup> | 15.200±1.540 <sup>bc</sup> |

*The same superscript letter indicates not significant differences between measurements*
